# Supplementary material for: Personalized Interventional Surgery of the Lumbar Spine: A Perspective on Minimally Invasive and Neuroendoscopic Decompression for Spinal Stenosis
Source: MDPI journal article supplement (doi:10.3390/jpm13050710), 2023-04-23
Supplement: s1 [file s1]

**Supplementary Document S1.**

**Members of Interamerican Society For Minimally Invasive Spine Surgery- Sociedad Interamericana de Cirugía de Columna Mínimamente Invasiva (SICCMi)**

Kai-Uwe Lewandrowski

Morgan P. Lorio

Álvaro Dowling

Paulo Sérgio Teixeira De Carvalho

Luis Miguel Duchén Rodríguez

**Members of the International Society For Minimal Intervention In Spinal Surgery (ISMISS)**

Kai-Uwe Lewandrowski

**Members of the International Intradiscal Therapy Society (IITS)**

Kai-Uwe Lewandrowski

Anthony Yeung

**Members of the Society for Brain Mapping and Therapeutics (SBMT)**

Kai-Uwe Lewandrowski

Vicky Yamamoto

Babak Kateb

**Members of the Chinese Orthopaedic Association–Minimally Invasive Surgery Section (COA-MIS Section)**

Huilin Yang

Jiancheng Zeng

Bin Meng

**Members of the Iberolatinoamerican Spine Society–Sociedad Iberolatinoamericana de Columna (SILACO)**

Jorge Felipe Ramírez León

Jaime Moyano

José Antonio Soriano Sánchez

Luis Miguel Duchén Rodríguez

**Members of the Federation of Latinamerican Neurosurgical Societies–Federación Latinoamericana de Sociedades de Neurocirugía (FLANC)**

José Antonio Soriano Sánchez

Luis Miguel Duchén Rodríguez

José Edgardo Valerio Pascua

**Members of Brazilian Society For Thoracic Surgery – Sociedade Brasileira de Cirurgia Torácica (SBCT)**

Rossano Kepler Alvim Fiorelli

**Members of the Korean Minimally Invasive Spine Society (KOMISS)**

Kang Taek Lim

Jeong-Yoon Park

Hyeun-Sung Kim

**Members of the Bolivian Spine Association**

Juan Marcelo Sea Aramayo

Luis Miguel Duchén Rodríguez

**Members of the Colombian Spine Society–Sociedad Colombiana de Columna (SOCCOL)**

Fernando Alvarado Gómez

Carolina Ramirez

**Members of Mexican Association Of Spinal Surgeons, Ac-Asociacion Mexicana De Cirujanos De Columna (AMCICO)**

Alfonso Garcia

Eulalio Elizalde Martínez

Iliana Margarita Gómez Silva

José Antonio Soriano Sánchez

**Members of Latin American Society of Neurosurgeons of USA & Canada (SLANC)**

José Edgardo Valerio Pascua

**Members of the Brazilian Spine Society (SBC)**

Robert Meves

Cristiano M. Menezes

Luis Eduardo Carelli

Alexandre Fogaça Cristante

Rodrigo Amaral

Geraldo de Sa Carneiro

Helton Defino
